# Supplementary material for: Effectiveness of an online mental health strengthening module to build resilience and overcome stress for transitional aged medical students
Source: PubMed Central journal article supplement (PMC10582941; doi:10.3389/fdgth.2023.1207583), 2023-10-04
Supplement: Datasheet1.pdf [file Datasheet1.pdf]

## MODULE CONTENTS LIST

4  
LESSONS

21  
VIDEOS

All  
SKILL LEVEL

24  
QUIZ

Language  
LANGUAGE

|                                                         |   |
|---------------------------------------------------------|---|
| UNDER MODULE 1                                          | ▼ |
| UNDER MODULE 2                                          | ▲ |
| Stress and Ways to Overcome Stress                      |   |
| <a href="#">GO TO</a>                                   |   |
| UNDER MODULE 3                                          | ▲ |
| Mental Health Problems and Symptoms of Mental Disorders |   |
| <a href="#">GO TO</a>                                   |   |
| UNDER MODULE 4                                          | ▼ |

Please fill out the following form if you have any questions.

No

Email

Regarding

Question

SEND

**Contact:**

Transition Module Research Team  
Division of Child and Adolescent Psychiatry  
Department of Psychiatry  
Medical School  
University of Indonesia

**Address:**

Faculty of Medicine, University of Indonesia  
Jl. Salemba Raya No. 6 Jakarta 10430

**Email:**

admin@modultransisi.id
