# Supplementary material for: Effectiveness of an online mental health strengthening module to build resilience and overcome stress for transitional aged medical students
Source: PubMed Central journal article supplement (PMC10582941; doi:10.3389/fdgth.2023.1207583), 2023-10-04

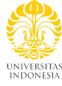

## TRANSITION AND ADAPTATION TO RESILIENCE



**Coping With Life Changes, Growing Up And Becoming Resilient**



**Recognizing Stress and Strengthening Mental Health Modules in the Adaptation Process of New Students at the Faculty of Medicine.**



### Introduction Videos

Let's watch the following video to find out what Transition is and what challenges first year students will face.

START STUDY

**Contact:**  
 Transition Module Research Team  
 Division of Child and Adolescent Psychiatry  
 Department of Psychiatry  
 medical School  
 University of Indonesia

**Address:**  
 Faculty of Medicine, University of Indonesia  
 Jl. Salemba Raya No. 6 Jakarta 10430

**E-mail:**  
 admin@modultransisi.id

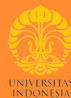

Supplement: Datasheet3.pdf [file Datasheet3.pdf]
